# Supplementary material for: Continuous secondary ice production initiated by updrafts through the melting layer in mountainous regions
Source: Copernicus journal article supplement (doi:10.5194/acp-2020-986), 2020-10-13
Supplement: Supplementary file [file acp-2020-986-AC2-supplement.pdf]

We thank our reviewer Alexei Korolev for this very thorough and constructive feedback. The incorporated suggestions significantly improved the quality of the manuscript. In the following, we address each comment and point to the according changes in our manuscript. The reviewer comments are displayed in italics, while the responses are given below each comment with the according changes in the manuscript in blue.

## Comments

*1. Visual assessment of the images in Fig.1 suggests that many pristine ice crystals (plates, thick plates, short columns, columns) were not identified as such and fall into a different category. This could occur due to their orientation (as mentioned in the text), which could hinder their classification. The eyeball recognition used in this study has a subjective component and it depends on the experience of the expert performing the recognition. A more objective way would be to use a neural network recognition trained on ice analogue crystals (e.g. Ulanowski et al. JQSRT, 2006) or synthetic images of pristine ice particles with different orientations. Developing this technique is obviously time consuming, and this is rather a suggestion for future research. Regarding this work, I am concerned that the number of pristine ice crystals were underestimated. Consequently, this may affect the parameterization, which you attempted in the second part of your paper. I would strongly suggest reassessing the number of pristine ice particles. For training purposes, you may consider a ray tracing software (e.g. Zemax or equivalent) to generate the appearance of faceted hexagonal ice crystals with different orientations.*

We are aware that the eyeball recognition has a subjective component. A neural network recognition would be for sure more objective. However, it would need a large enough training set from our instrument, which is not available. Artificially created ice crystals or data from other instruments are most likely too different from the holographic images to be used for training. We are currently working on collecting enough data from holographic imagers to train a neural network. However, this will not be done within the time scope of the manuscript. Therefore, the eyeball recognition is so far our best estimate.

All ice crystals, which could not be clearly identified by their shape (i.e. “unidentified” class in Fig.5 in the manuscript), were expected to be plates as described in the manuscript. Therefore, we do not believe that the number of pristine ice crystals was underestimated. The parametrization was derived independently of our observation but based on laboratory studies and is, therefore, not influenced by our estimation of the number of pristine ice crystals. In a second step, we tuned the parametrization to explain our observations. The tuned version of the parametrization is undoubtedly influenced by the subjective component of the eyeball recognition. However, the shortcomings of this application are discussed in section 4.3.2.

*2. In addition to the previous comment, could you classify each particle in Fig.1. This will be useful for the assessment of the quality of image recognition and help understand the results of the particle classification.*

We agree that showing the class of each displayed ice crystal is useful for the assessment of the quality of the image recognition. We adapted Fig. 5 in the manuscript to show the class of each displayed ice crystal.

3. *Could you include your definition of an ice plate? What is the separation between thick plates and short columns in terms of their aspect ratios ( $h/L$ )?*

We added a definition of plates and columns (page 7, lines 4-6):

“Plates and columns are hexagonal prisms with the diameter of the hexagonal basis  $a$  and the prism height  $h$ . Plates have a dimension of  $a > h$ , while columns have a dimension of  $a \leq h$ .

4. *Page 11: “However, the fall velocity of irregular particles is hard to assess and it remains unclear if they have fallen from above or formed at the measurement site by SIP.” You could use for the fall velocity assessment min-max range of the fall velocity based on the aspect ratio of ice particles and their sizes?*

There are only equations available for specific ice crystal habits but not for irregular shaped ice crystals. To have a more accurate calculation of the relative velocities of ice crystals and cloud droplets, we now divide the crystals into plates and lump graupel and use given parametrizations to calculate the fall velocity of each ice crystal. This had a noticeable change only in the collision rate of the largest observed droplet (see Fig. 8 manuscript) by a factor of about 0.5. It had a minor effect on the splinter generation rate. See page 16, line 20-30 and all changes in the calculations hereafter:

“To calculate the fall velocities of the ice crystals, we divide them into plates and lump graupel. The former includes the classes plates and unidentified, while the later includes all other ice crystals (see section 2.2 for a more detailed description of the classes). The fall velocity of plates was calculated with the following equation from Pruppacher and Klett (2010) (converted to SI base units) using the maximum dimension of plates  $L_{\text{pla}}$ :

$$v(L_{\text{pla}}) \approx 156 \text{m}^{0.14} \text{s}^{-1} \cdot L_{\text{pla}}^{0.86}. \quad (6)$$

To derive the fall speed of lump graupel with a maximum dimension of  $L_{\text{gra}}$ , we use the equation provided by Locatelli and Hobbs (1974) (again, converted to SI base units):

$$v(L_{\text{gra}}) \approx 124 \text{m}^{0.34} \text{s}^{-1} \cdot L_{\text{gra}}^{0.66}. \quad (7)$$

This yields a splinter generation rate of  $0.06 \text{ L}^{-1} \text{ min}^{-1} \pm 0.02 \text{ L}^{-1} \text{ min}^{-1}$  of secondary ice, which is about one order of magnitude below the estimated production rate of secondary ice of  $0.24 \text{ L}^{-1} \text{ min}^{-1} \pm 0.09 \text{ L}^{-1} \text{ min}^{-1}$  derived from the observations.”

5. *It would be useful to show the statistical significance of the amount of sampled cloud particles in a separate table, e.g. total number of sampled droplets, droplets >40μm, total number of crystals, number of columns, plates, irregulars, aged ice, etc. The histogram in Fig.1 shows concentrations of ice particles with different habits. However, it is not clear what the statistical significance of these measurements.*

We added the total concentration of all habits and their uncertainties to the histogram plot in Fig. 5 in the manuscript (page 11). The uncertainty for droplets larger than 40 μm and the CDNC is shown in Fig. 6 as shaded areas.

6. *It would be extremely beneficial and informative for this study to show the profiles of the air temperature, relative humidity, droplet concentration for each platform ascent, and show types of hydrometeors observed on different levels.*

We agree that profiles over time would be beneficial. The profiles of the temperature and relative humidity can now be inferred from Fig. 3c and d in the manuscript and are described in the text as follows (page 8, lines 7-12):

“The temperatures and relative humidities at Gotschnaboden and Gotschnagrat (Fig. 3c, d) are derived from measurements of the highest and lowest point of the measurements on the gondola and are, therefore, only available when the gondola was in operation and close to one of the stations. During the measurement period, the temperature in Klosters increased from about +1.5 °C to +3.5 °C at a relative humidity of about 80%, while the measurements on the gondola were taken mainly between 0°C and -2.5°C at relative humidities above 95%.”

We cannot analyse the ice crystal data profiles due to a lack of statistical significance but can show the CDNC for each ride divided into three height intervals (see Fig. 1 below) as cloud droplets are abundant enough for statistical significance. The figure shows that the lowest height interval has on average a lower CDNC, most likely because it is close to or partly at the cloud base. Furthermore, the habits number concentrations (excluding columns due to their total small amount) and the CDNC divided into three temperature intervals are shown averaged over all rides in Fig. 2 below. We divided the data in temperature intervals instead of height intervals to ensure the comparison of similar thermodynamical conditions. The figure shows that aged ice crystals are rather constant over the measured temperature range, while the smaller ice crystals are less abundant at higher temperatures in accordance with our theory: New ice crystals need some time to grow to a size where they can be detected and are being lifted up during this time. No secondary ice is expected to form above 0°C and therefore, we expect less secondary ice closer to 0°C as is already outlined in the manuscript (page 18, lines 6-10). At the same time, aged ice crystals fall from above and are not influenced by this effect. Even though, we agree that these plots are interesting to look at, we do not think that they provide essential information for our study and we therefore did not include them in our manuscript.

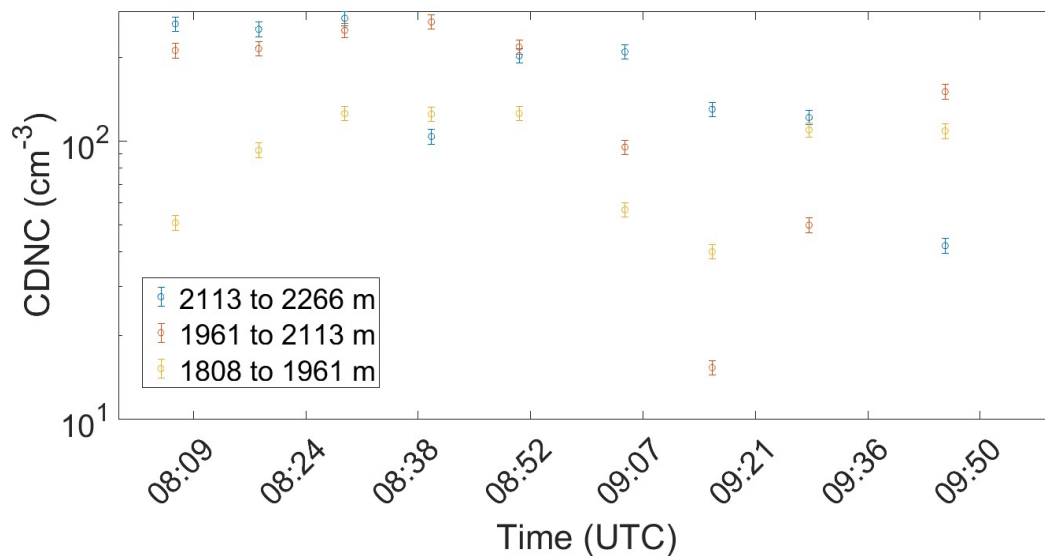

Figure 1: The CDNC of each ride averaged over three height intervals.

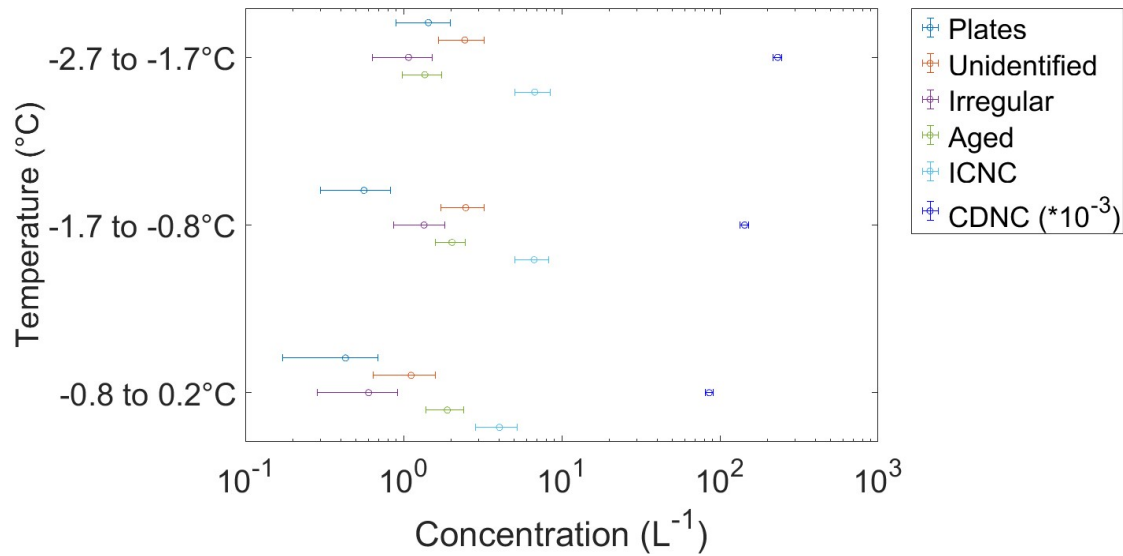

Figure 2: The different habits, the ICNC and the CDNC divided into three temperature intervals containing the data from all rides.

7. Page 13, line 16: “The estimated updraft in this case study is about  $0.6 \text{ m s}^{-1}$ , which is equal to the fall speed of a  $150 \mu\text{m}$  droplet”.  $0.6 \text{ m/s}$  is a terminal fall velocity of  $150 \mu\text{m}$  diameter droplet. At the updraft velocity  $0.6 \text{ m/s}$  this droplet will be suspended at the same altitude. In order to bring this droplet above the melting layer the updraft velocity should be  $u_z > 0.6 \text{ m/s}$ .

We are not saying that the updraft is enough to lift a droplet of  $150 \mu\text{m}$  in diameter but only droplets smaller than  $150 \mu\text{m}$  in diameter. Most of the droplets are smaller than  $150 \mu\text{m}$  (79%). We also want to point out, that the given updraft velocity is a very rough estimate. We adapted the following sentence to make this more clear (page 13, lines 15-16):

“Most of the observed droplets were smaller than  $150 \mu\text{m}$  and could be lifted up in the clouds by the updraft, while the remaining ones could have been brought into the cloud by local turbulences.”

8. Check Eq.2:  $E$  is a function of  $d$  and  $d_i$ . Summing should be performed over  $E$  as well. Not sure where 2 is coming from. Should it be 4?

Yes,  $E$  is a function of the droplet and ice crystal size and we added the dependency in the equation. Above that, we are very thankful for indicating a major error in our equation and replaced 2 by 4. This correction changed the results and the interpretation slightly. The following lines of the manuscript were adapted:

Page 1, lines 12-15:

“Based on previous measurements, we estimate that a droplet of  $200 \mu\text{m}$  in diameter produces 18 secondary ice crystals when it fragments upon freezing. The application of the parametrization to our measurements suggests that the actual number of splinters produced by a fragmenting droplet may be up to an order of magnitude higher.”

Page 20, lines 10-13:

“Applying the presented parametrization to our measurements could not explain the estimated concentration of secondary ice and the number of splinters produced per fragmenting droplet has to be higher, i.e., a droplet of 200  $\mu\text{m}$  in diameter has to produce  $99\pm62$  splinters upon fragmentation. This number can be reduced to  $44\pm26$  if we assume that all droplets larger than 40  $\mu\text{m}$  fragment when they freeze.”

9. The rate of splinter production is expected to depend on droplet concentration (CDNC). For example, if  $CDNC=0$ , then  $G_{sp}=0$ . However, none of the equations Eq.5 and Eq.6 includes CDNC. Please, check Eq.5 and Eq.6.

Eq. 5) and 6) gave the rate of splinter production per droplet with diameter  $d$ . To calculate the actual splinter generation rate, the equations needed to be multiplied with the concentration of droplets with according diameters, which was done to calculate the splinter generation rate in the cloud. However, we agree that presenting the equation in this way is misleading. To show the actual splinter generation in the cloud, the splinter generation per droplet with diameter  $d_n$  is now summed up and divided by the total volume (page 15, lines 1-11 and all changes in the calculations hereafter):

“Here we derive a parametrization of the SIP by droplet fragmentation at temperatures close to 0 °C when primary ice nucleation can be neglected and droplets freeze only by the collision with ice crystals, which either sedimented from above or formed by SIP. Like Korolev et al. (2020), we assume that only droplets larger than 40  $\mu\text{m}$  are likely to contribute to SIP by droplet fragmentation. To calculate the splinter generation rate of a droplet with diameter  $d_n$  ( $g_{sp}(d_n)$ ), the droplet freezing rate by collision ( $f_{col}(d_n)$ ) has to be multiplied by the droplet fragmentation probability during freezing ( $p_{df}(d_n)$ ) and the number of splinters per fragmenting droplet ( $N_{sp}(d_n)$ ):

$$g_{sp}(d_n) = f_{col}(d_n) \cdot p_{df}(d_n) \cdot N_{sp}(d_n). \quad (1)$$

To obtain the total splinter generation rate ( $G_{sp}$ ) in a volume  $V$ , which contains  $N_{d>40\mu\text{m}}$  droplets with diameters larger than 40  $\mu\text{m}$ , the sum of  $g_{sp}(d_n)$  over all droplets with diameter  $d_n$  ( $n= 1,2,\dots, N_{d>40\mu\text{m}}$ ) has to be divided by  $V$ :

$$G_{sp} = \frac{1}{V} \sum_{j=1}^{N_{d>40\mu\text{m}}} g_{sp}(d_n). \quad (2)$$

10. Page 8, line 19: “of of”

The double wording has been removed.

11. Page 13, line 28: “Korolev et al. (2020) argued that INP activation in transient supersaturation around freezing drops could not be shown to be active in the atmosphere.” This is an overstatement. The mentioned work suggested that this mechanism is unlikely to be active in a relatively warm environment (e.g.  $T>-4\text{C}$ ). However, this mechanism may be active in convective clouds with strong updrafts at temperatures  $T<-20\text{C}$ .

The statement was adapted as follows (page 13, lines 26-27):

“Additionally, INP activation in transient supersaturation around freezing drops is unlikely to be active in a relatively warm environment (Korolev et al., 2020).”

12. *Tale 1: remove duplicated line 3.*

The table showed the properties of each measured droplet of which two of them have the same diameter and were therefore displayed twice. However, we noticed that this is not a good way to display the results. We removed the table and included plots to get a better overview of the results (page 18: Fig. 8).

### Additional remarks

We would like to point out that we did some essential changes, which are not all part of the responses. They are addressed in the following:

1. We removed Figure 7, which showed a histogram of the sizes of all observed droplets larger than 40  $\mu\text{m}$  as all droplets are now shown in Fig. 8 of the manuscript, where the values of the different parameters are plotted.
2. The observed secondary ice production rate is given as a number with uncertainties instead of a range as this is easier to interpret (page 14, lines 2-3):

“Taking all named uncertainties into account, the rate of secondary ice production during our case study is  $0.24 \text{ L}^{-1} \text{ min}^{-1} \pm 0.09 \text{ L}^{-1} \text{ min}^{-1}$ .”

This change slightly influenced all calculations, which included the observed secondary ice production rate in section 4.3.1.

3. The splinter generation rate is given per volume and time instead of only per time as this makes its interpretation easier. Furthermore, we no longer consider size bins for the ice crystals but take all ice crystals into account to have more accurate calculations. This changed the equations in section 4.3.

All changes are marked in the final version of the manuscript.
